# Supplementary material for: Quercetagetin and Patuletin: Antiproliferative, Necrotic and Apoptotic Activity in Tumor Cell Lines
Source: PubMed Central journal article supplement (PMC6222523; doi:10.3390/molecules23102579), 2018-10-09
Supplement: molecules-23-02579-s001.pdf [file molecules-23-02579-s001.pdf]

# Quercetagenin and patuletin: antiproliferative, necrotic and apoptotic activity in tumor cell lines

Jesús J. Alvarado-Sansinenea <sup>1</sup>, Luis Sánchez-Sánchez <sup>2</sup>, Hugo López-Muñoz <sup>2</sup>, María L. Escobar <sup>3</sup>, Fernando Flores-Guzmán <sup>2</sup>, Rosario Tavera-Hernández <sup>1</sup> and, Manuel Jiménez-Estrada <sup>1,\*</sup>

<sup>1</sup> Laboratorio 2-10. Departamento de Productos Naturales, Instituto de Química, Universidad Nacional Autónoma de México, México. ; manueljemex@gmail.com

<sup>2</sup> Laboratorio 6 3er piso. UMIEZ, Facultad de Estudios Superiores Zaragoza, Universidad Nacional Autónoma de México, México.; luiss@unam.mx

<sup>3</sup> Laboratorio de Microscopía Electrónica, Departamento de Biología Celular, Facultad de Ciencias, Universidad Nacional Autónoma de México, México.

## Content

|                          |   |
|--------------------------|---|
| NMR analysis .....       | 2 |
| HR-DART-MS analysis..... | 4 |
| Dot plot Caspase-8.....  | 5 |
| Dot plot Caspase-9.....  | 6 |

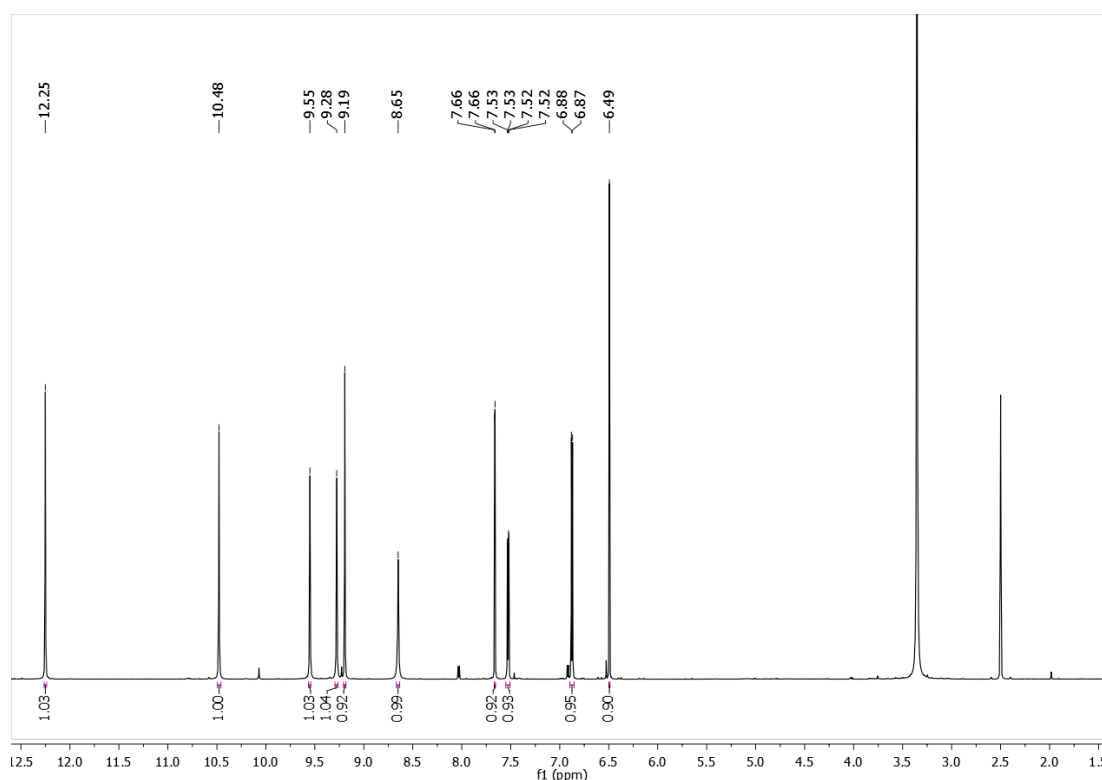

**Figure S1.** <sup>1</sup>H Spectrum of quercetagenin

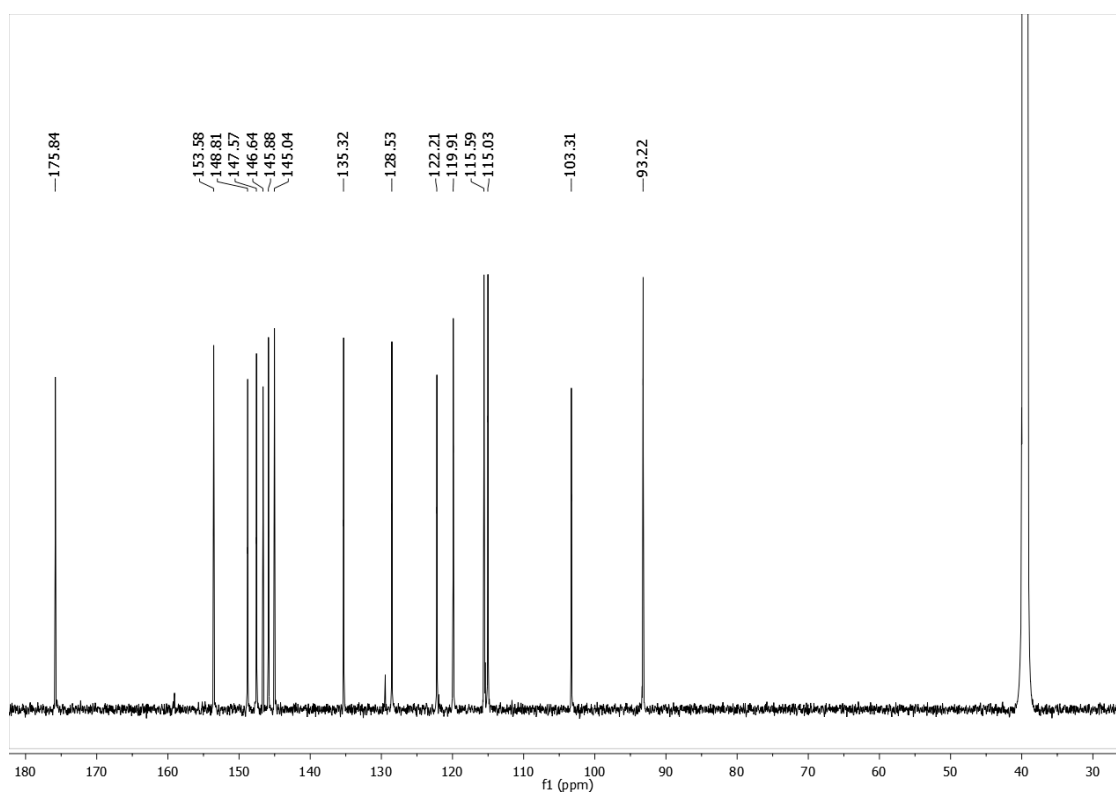Figure S2.  $^{13}\text{C}$  Spectrum of quercetagenin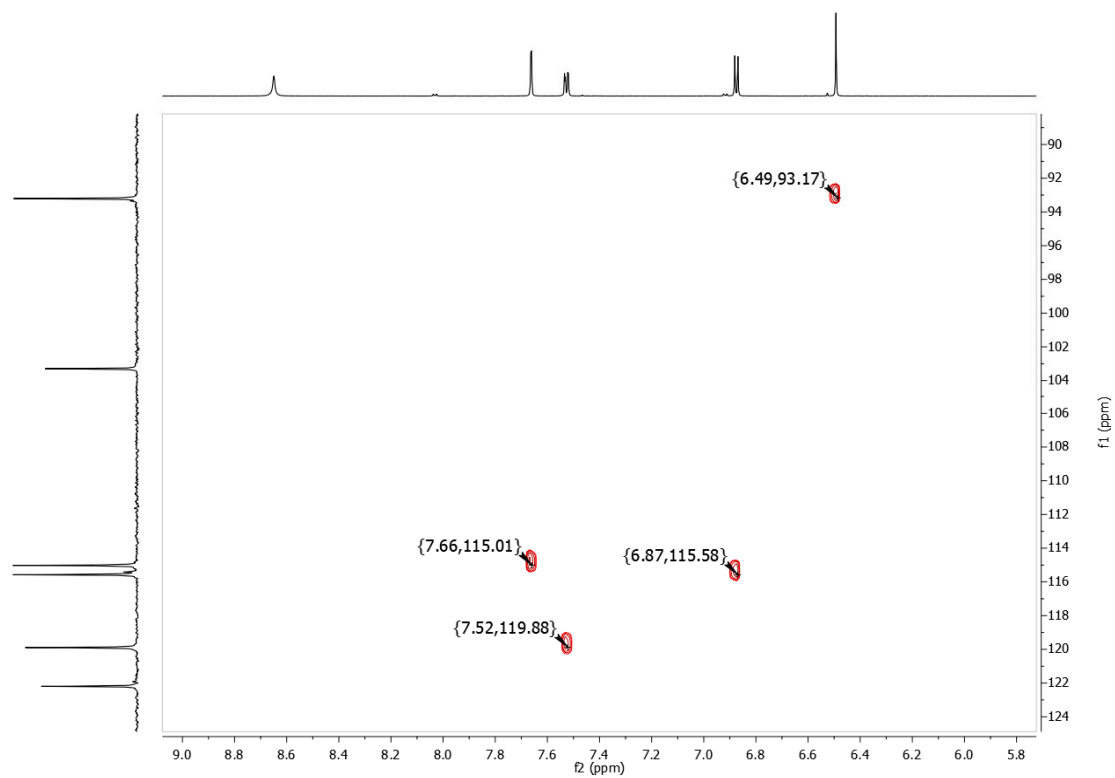

Figure S3. HSQC Spectrum of quercetagenin

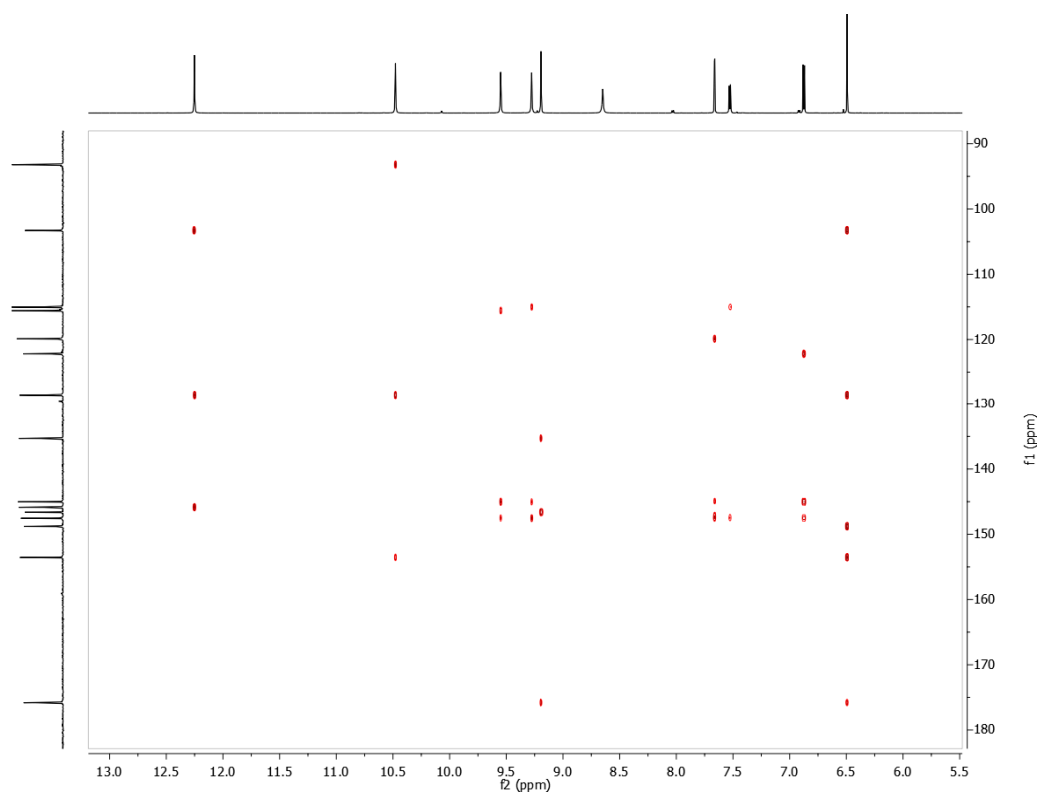

Figure S4. HMBC Spectrum of quercetagenin

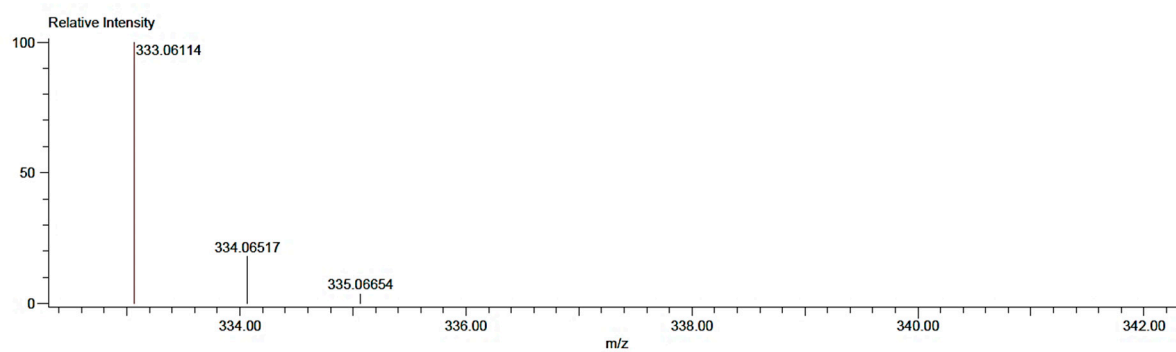

| Mass      | Intensity | Calc. Mass | Mass Difference (mmu) | Mass Difference (ppm) | Possible Formula                            | Unsaturation Number |
|-----------|-----------|------------|-----------------------|-----------------------|---------------------------------------------|---------------------|
| 333.06114 | 379536.22 | 333.06104  | 0.10                  | 0.30                  | $^{12}\text{C}_{16}\text{H}_{13}\text{O}_8$ | 10.5                |

Figure S5. HR-DART-MS positive ion mode of patuletin

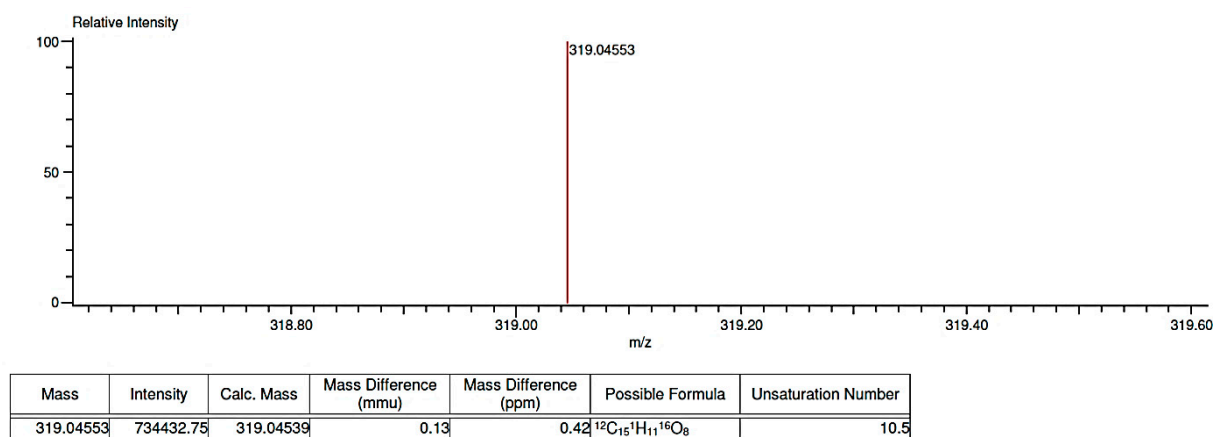

**Figure S6.** HR-DART-MS positive ion mode of quercetagenin

SK-LU-1

MDA-MB-231

CASKI

SK-LU-1

MDA-MB-231

CASKI

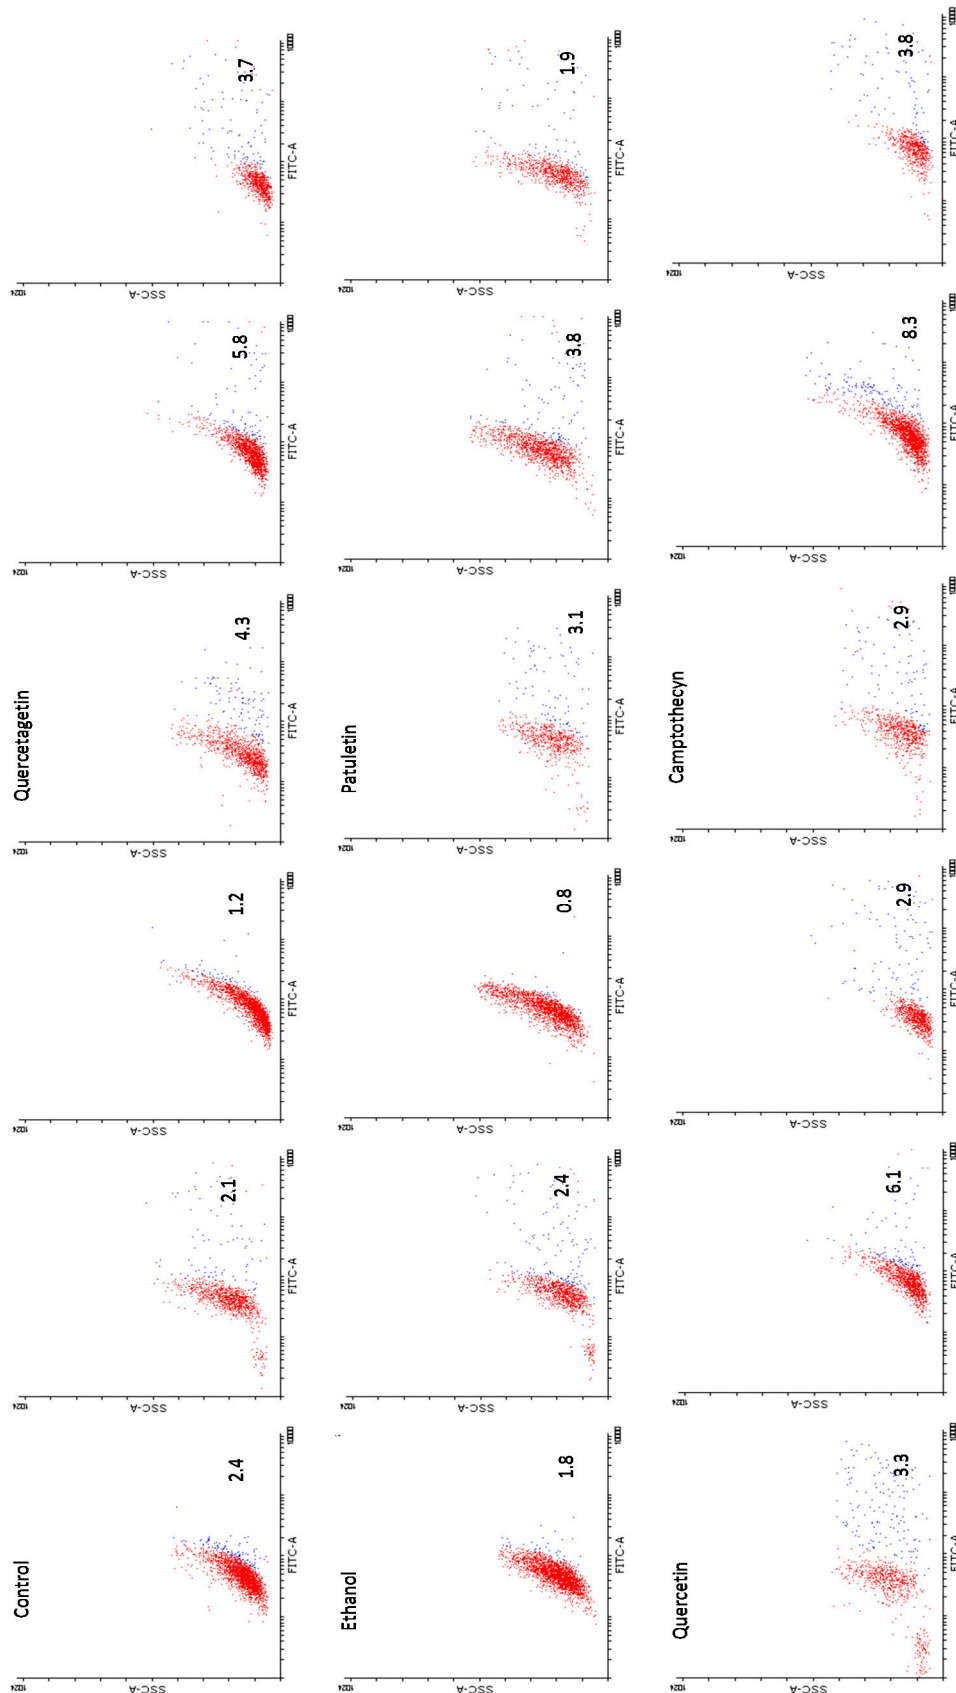

Figure S7. Detection of active caspase-8 in CaSki, MDA-MB-231 and SK-Lu-1 cell cultures exposed to quercetin, quercetagetin and patuletin at the aforementioned IC50 values.

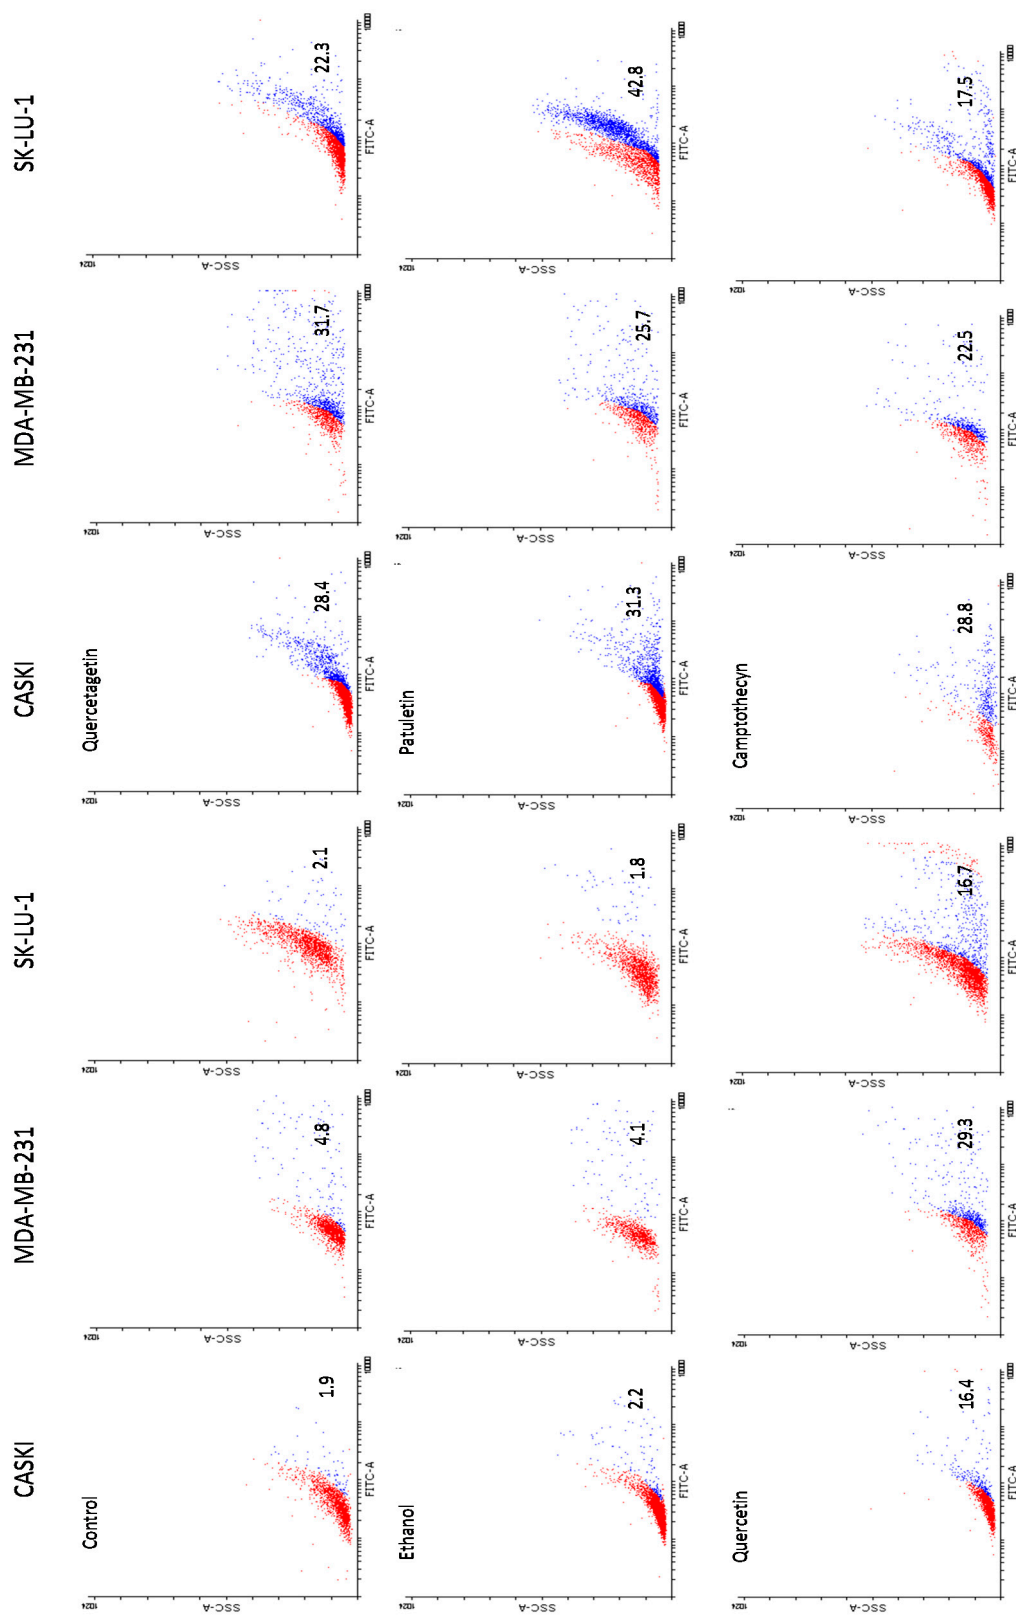

Figure S8. Detection of active caspase-9 in CaSki, MDA-MB-231 and SK-Lu-1 cell cultures exposed to quercetin, quercetagetin and patuletin at the aforementioned IC50 values.
